# Supplementary material for: Motherhood Penalties and Fatherhood Premiums: Effects of Parenthood on Earnings Growth Within and Across Firms
Source: Oxford University Press journal article supplement (doi:10.1215/00703370-8917608), 2021-01-11
Supplement: yu_esm.pdf [file yu_esm.pdf]

## ONLINE APPENDIX

Table A1: Weighted descriptive statistics of the analytic sample

|                                         | Men           | Women        |
|-----------------------------------------|---------------|--------------|
| Log hourly wages (in cents)             | 7.0 (.8)      | 6.8 (.8)     |
| Parenthood status:                      |               |              |
| No child                                | 43.9          | 40.1         |
| One child                               | 18.4          | 18.1         |
| Two children                            | 21.3          | 24.2         |
| Three and more children                 | 16.4          | 17.6         |
| Education:                              |               |              |
| Less than high school                   | 3.2           | 1.5          |
| High school                             | 56.0          | 47.7         |
| Some college                            | 20.9          | 28.1         |
| University and more                     | 20.0          | 22.6         |
| Work experience (month)                 | 159.9 (103.8) | 143.4 (98.7) |
| Job tenure (month)                      | 58.2 (68.6)   | 54.6 (65.4)  |
| Number of major breaks since age 22     | .5 (.9)       | .7 (1.1)     |
| Number of employer changes since age 22 | 3.9 (4.4)     | 3.2 (3.7)    |
| Age under 22 <sup>a</sup>               | 10.2          | 10.1         |
| Full-time job <sup>a</sup>              | 90.2          | 76.8         |
| Marital status:                         |               |              |
| Never-married, not cohabiting           | 33.9          | 29.2         |
| Never-married, cohabiting               | 2.9           | 2.0          |
| Married, spouse <20 work hours          | 18.0          | 6.8          |
| Married, spouse 20-34 work hours        | 6.7           | 1.6          |
| Married, spouse working full-time       | 27.2          | 43.5         |
| Separated/divorced/widowed              | 11.4          | 17.0         |
| Region:                                 |               |              |
| Northeast                               | 17.3          | 17.7         |
| North Central                           | 24.0          | 23.5         |
| South                                   | 38.4          | 40.3         |
| West                                    | 20.4          | 18.5         |
| Urban area <sup>a</sup>                 | 78.4          | 79.0         |
| N                                       | 1,176,234     | 1,039,476    |

Note: Values for categorical variables are in percent. The mean values, followed by standard deviations the next column, are presented for all other variables. All the descriptive statistics are weighted by the NLSY79's longitudinal sample weights. The unit of observation in the analytic sample is person-months.

<sup>a</sup> indicates dummy variables.
